# Supplementary material for: Regulation of glucolipid metabolism and gut microbiota by green and black teas in hyperglycemic mice
Source: Royal Society of Chemistry journal article supplement (doi:10.1039/d3fo00355h), 2023-01-01
Supplement: d3fo00355h1.pdf [file d3fo00355h1.pdf]

1 **Regulating the dysbiosis of glucolipid metabolism and gut microbiota in**  
2 **hyperglycemic mice by green and black teas**

3 Hui Zhou <sup>a,1</sup>, Fanglan Li <sup>a,1</sup>, Meirong Wu <sup>a,1</sup>, Jiangxiong Zhu <sup>a,b</sup>, Xinlin Wei <sup>a,b\*</sup>,  
4 Yuanfeng Wang <sup>a,\*</sup>

5 <sup>a</sup>Institute of Engineering Food, College of Life Sciences, Shanghai Normal University,  
6 100 Guilin Road, Xuhui District, Shanghai 200234, China

7 <sup>b</sup> Department of Food Science & Technology, School of Agriculture and Biology,  
8 Shanghai Jiao Tong University, 800 Dongchuan Road, Minhang District, Shanghai  
9 200240, China

10 1 Hui Zhou, Fanglan Li, and Meirong Wu contributed equally to this work.

11 \* Xinlin Wei (foodlab2010@163.com) and Yuanfeng Wang (yfwang@shnu.edu.cn)  
12 are corresponding authors of this work.

13

14

15

Table S1 Fluorescent quantitative PCR primer information

| mRNA          | Primer sequence               |
|---------------|-------------------------------|
| SREBF1        | 5' : AGACAAACTGCCCATCCACC     |
|               | 3' : CAGGTCCTTCAGTGATTTGCTTT  |
| PPAR $\alpha$ | 5' : TTCCCTGTTTGTGGCTGCTAT    |
|               | 3' : CTTTGGGAAGAGGAAGGTGTCA   |
| Txnip         | 5' : CTACAGCAGGTGAGAACGAGATG  |
|               | 3' : TCTTCTCCTTTTTGGCAGACACT  |
| FoxO1         | 5' : TCACCCAGTCCAAACTACTCAAA  |
|               | 3' : CTCCGTAACCTTGATTTGCTGTCC |
| PI3K          | 5' : AACCGAAACAAAGCGGAGAAC    |
|               | 3' : AGGGAGGTGTGTTGATAATGTAGC |
| AKT           | 5' : CGTAGCCATTGTGAAGGAGGG    |
|               | 3' : GGCAGCGGATGATAAAGGTGTT   |

16

Table S2. The nutritional contents of two different feeds

| Matching                          | High fat and sugar feed<br>(Total energy, 5127.6 Kcal/kg) |         | Shoobree common standard feed<br>(Total energy, 3656 Kcal/kg) |          |
|-----------------------------------|-----------------------------------------------------------|---------|---------------------------------------------------------------|----------|
|                                   | Main index                                                | Content | Main index                                                    | Content  |
| Basic feed (38%)                  | Moisture                                                  | 4%      | Moisture                                                      | ≤10%     |
| Lard (28%)                        | Crude protein                                             | 23.25%  | Crude protein                                                 | ≥20%     |
| Sucrose (5.6%)                    | Crude fat                                                 | 34.55%  | Crude fat                                                     | ≥4%      |
| Whole milk powder (10.8%)         | Crude fiber                                               | 3.02%   | Crude fiber                                                   | ≤5%      |
| Casein (11.5%)                    | Crude ash                                                 | 4.43%   | Crude ash                                                     | ≤8%      |
| Microcrystalline cellulose (1.9%) | Calcium                                                   | 1.08%   | Calcium                                                       | 1.0-1.8% |
| Laboratory premix (2%)            | Total phosphorus                                          | 0.71%   | Total phosphorus                                              | 0.6-1.2% |
| Calcium hydrogen phosphate (1.8%) |                                                           |         | Lysine                                                        | ≥1.32%   |
| stone powder (0.4%)               | □                                                         | □       | Methionine+cystine                                            | ≥0.78%   |
